# Supplementary material for: Inkjet printing of CH3NH3PbI3on a mesoscopic TiO2film for highly efficient perovskite solar cells
Source: Royal Society of Chemistry journal article supplement (doi:10.1039/c4ta05675b), 2014-12-03
Supplement: c4ta05675b1.pdf [file c4ta05675b1.pdf]

## Supporting Information

Shao-Gang Li, Ke-Jian Jiang, Mei-Ju Su, Xue-Ping Cui, Jin-Hua Huang, Qian-Qian Zhang, Xue-Qin Zhou, Lian-Min Yang, Yan-Lin Song

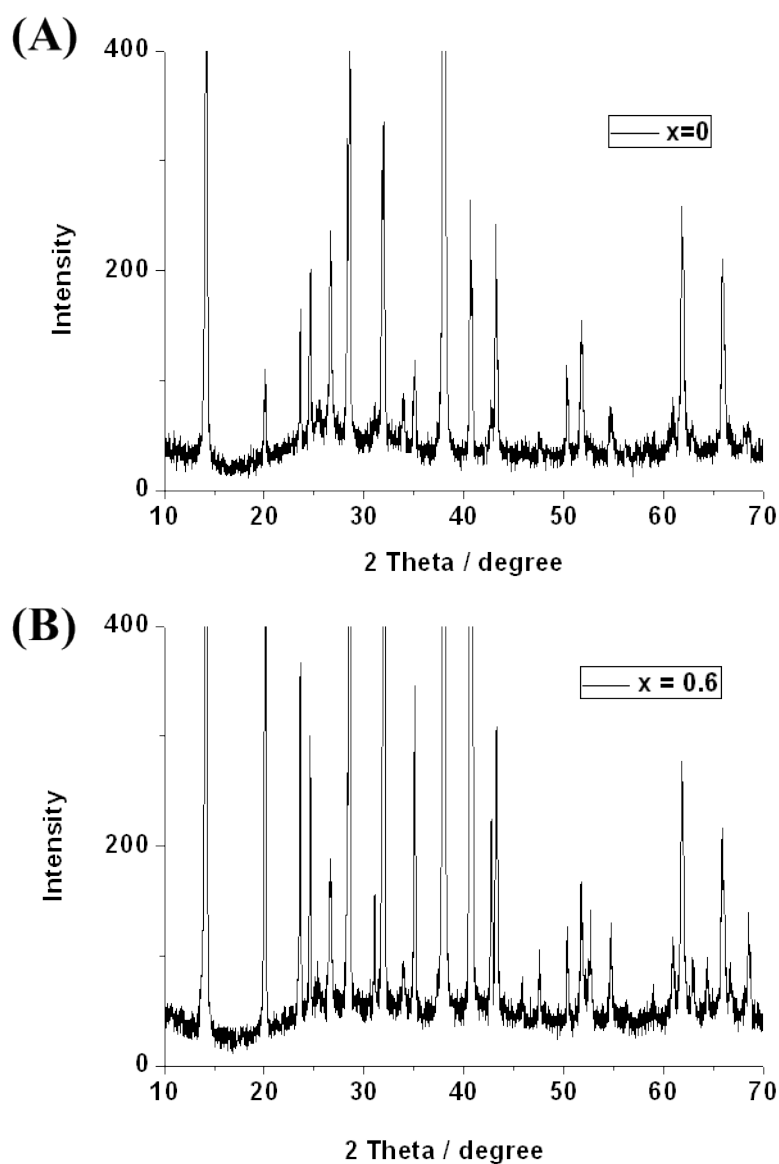

**Figure S1:** XRD diffraction patterns of the perovskite-coated  $\text{TiO}_2$  films prepared at  $x=0$  (A) and 0.6 (B) from the precursor solution (the molar ratio of  $\text{PbI}_2$ , MAI, and MAcl is 1-x:1:x)

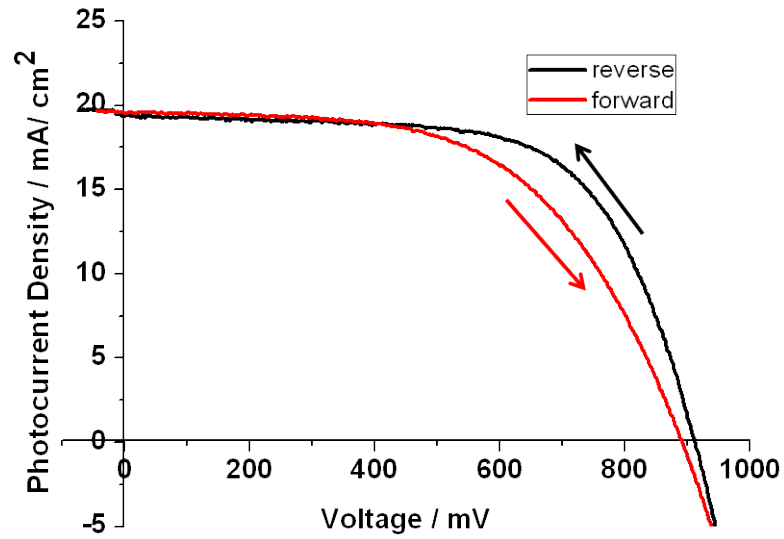

**Figure S2:** Typical  $J$ - $V$  curves recorded by the reverse scans with reverse and forward directions at a rate of 200 mV/s for the printing perovskite solar cell (device 6).

**Table S1** Photovoltaic performance of the devices prepared at different table temperature.

| Device   | Temperature / °C | $J_{sc}$ / mA cm <sup>-2</sup> | $V_{oc}$ / mV | $FF$        | $\eta$ / % |
|----------|------------------|--------------------------------|---------------|-------------|------------|
| device 1 | 25               | 12.56 ± 0.67                   | 790 ± 0.30    | 0.61 ± 0.03 | 6.6 ± 0.4  |
| device 2 | 40               | 13.46 ± 0.63                   | 824 ± 0.30    | 0.63 ± 0.02 | 7.2 ± 0.4  |
| device 3 | 50               | 14.25 ± 0.71                   | 826 ± 0.50    | 0.65 ± 0.04 | 7.9 ± 0.5  |
| device 4 | 60               | 13.83 ± 0.74                   | 822 ± 0.40    | 0.62 ± 0.04 | 7.3 ± 0.5  |

Note: All the values were averaged for four parallel samples.
